# Supplementary material
Source: Springer Nature journal article supplement (https://www.springermedizin.de/resource/supplementary/12993_2012_445_MOESM3_ESM.pdf/9617788)

the scores of RME

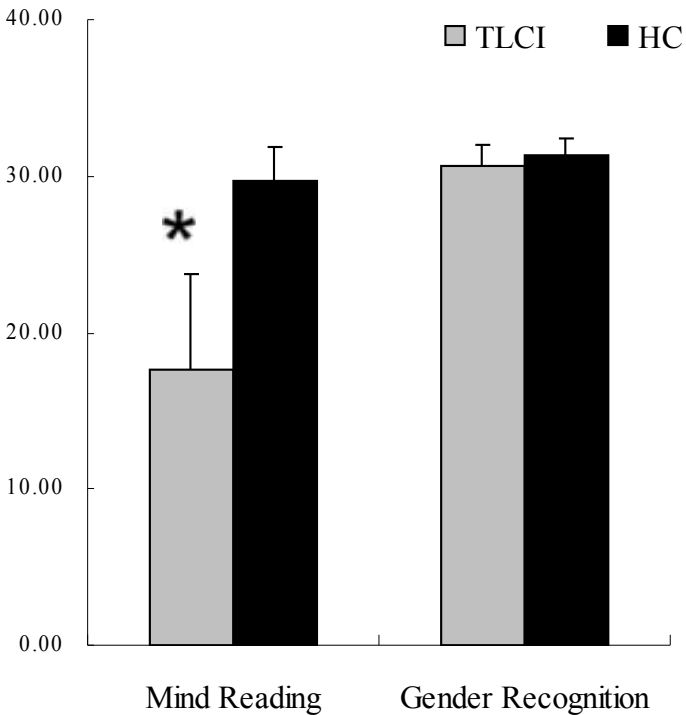

Supplement: MOESM3 [file 9617788]
